# Supplementary material for: Architecturally designed Pt–MoS2 and Pt–graphene composites for electrocatalytic methanol oxidation
Source: Royal Society of Chemistry journal article supplement (doi:10.1039/c5cp04141d), 2015-01-01
Supplement: c5cp04141d1.pdf [file c5cp04141d1.pdf]

## **Electronic Supplementary Information:**

### **Architecturally designed Pt-MoS<sub>2</sub> and Pt-graphene composites for electrocatalytic methanol oxidation†**

Sagar H. Patil,<sup>†1</sup>, Bihag Anothumakkool,<sup>†1</sup> Shivaram D. Sathaye<sup>2</sup> and Kashinath R. Patil<sup>†1\*</sup>

<sup>1</sup> National Chemical Laboratory, Dr. Homi Bhabha Road, Pashan, Pune- 411008, India.

<sup>†</sup>Academy of Scientific and Innovation Research (AcSIR) New Delhi-110001

<sup>2</sup>759/83 Deccan Gymkhana, Pune 411004, India.

By integrating the hydrogen adsorption/desorption curve in Fig. 8 (in manuscript) the Electro Chemical active Surface Areas (ECSA) were calculated. Following equation was used for the calculations.<sup>51-53</sup>

$$\text{ECSA (cm}^2\text{Pt/gPt)} = q_{\text{Pt}} / \Gamma^* L$$

Where,  $q_{\text{Pt}}$  is the charge density,

$\Gamma^* = 210 \mu\text{C/cm}^2$  Pt the charge required to reduce a monolayer of protons on Pt, and

$L = \text{gPt/cm}^2$  the Pt content or loading in the electrode.

ECSA values were found to be 13.4, 13, 10.8 and 10.4 m<sup>2</sup>/g, for Pt-MoS<sub>2</sub>, Pt-GNS, Pt NPs thin film and Pt/C respectively. The lower values of ECSA can be attributed to resistance of FTO.

By using the ECSA values and the actual mass of Pt in the electrodes intensities for methanol oxidation (mA/cm<sup>2</sup> and mA/mg) were calculated and are tabulated in following table.

| Sr.No | Sample              | Intensities of Methanol oxidation peak calculated by considering <b>geometrical area of the electrode</b> (mA/cm <sup>2</sup> ) (Manuscript) | Intensities calculated by considering <b>ECSA</b> of electrodes. mA/cm <sup>2</sup> | Intensities calculated by considering the <b>Pt mass</b> in active electrodes (mA/mg) |
|-------|---------------------|----------------------------------------------------------------------------------------------------------------------------------------------|-------------------------------------------------------------------------------------|---------------------------------------------------------------------------------------|
| 1     | Pt-MoS <sub>2</sub> | 3.07                                                                                                                                         | 13.23                                                                               | 177.4                                                                                 |
| 2     | Pt-GNS              | 2.61                                                                                                                                         | 10.53                                                                               | 137.5                                                                                 |
| 3     | Pt-NPs thin film    | 0.977                                                                                                                                        | 5.13                                                                                | 55.51                                                                                 |
| 4     | PT/C                | 0.772                                                                                                                                        | 3.18                                                                                | 33.16                                                                                 |

**Table-S1** Comparative study between the intensities calculated from geometrical area of the electrodes, an ECSA of electrodes and by considering the Pt mass in active electrodes.

| Sr. no. | Sample/Catalysts                | mA/mg      | Electrolyte                          | Reference |
|---------|---------------------------------|------------|--------------------------------------|-----------|
| 1       | Pt/C E-TEK                      | $95 \pm 8$ | 0.1 M HClO <sub>4</sub>              | Ref. S4   |
| 2       | octahedral Pt <sub>3</sub> Ni   | 440        | 0.1 M HClO <sub>4</sub>              | Ref. S5   |
| 3       | Au/Pt <sub>3</sub> Ni nanowires | 479        | 0.1 M HClO <sub>4</sub>              | Ref. S6   |
| 4       | GN-Pt <sub>3</sub> Ni-IL        | 870        | 0.1 M HClO <sub>4</sub>              | Ref. S7   |
| 5       | GN-Pt                           | 39         | 0.5 M H <sub>2</sub> SO <sub>4</sub> | Ref. S8   |
| 6       | Pt/Vulcan carbon                | 40         | 0.5 M H <sub>2</sub> SO <sub>4</sub> | Ref. S9   |
| 7       | Pt/C E-TEK                      | 31         | 0.5 M H <sub>2</sub> SO <sub>4</sub> | Ref. S8   |
| 8       | Pt nanoflowers/RGO/CCE          | 133.43     | 0.5 M H <sub>2</sub> SO <sub>4</sub> | Ref. S10  |
| 9       | Pt-MoS <sub>2</sub>             | 177.4      | 0.5 M H <sub>2</sub> SO <sub>4</sub> | This work |
| 10      | Pt-GNS                          | 137.5      | 0.5 M H <sub>2</sub> SO <sub>4</sub> | This work |
| 11      | Pt-NPs thin film                | 55.51      | 0.5 M H <sub>2</sub> SO <sub>4</sub> | This work |
| 12      | PT/C                            | 33.16      | 0.5 M H <sub>2</sub> SO <sub>4</sub> | This work |

**Table-S2** Literature study of intensities calculated from an ECSA of electrodes and by considering the Pt mass in active electrodes.

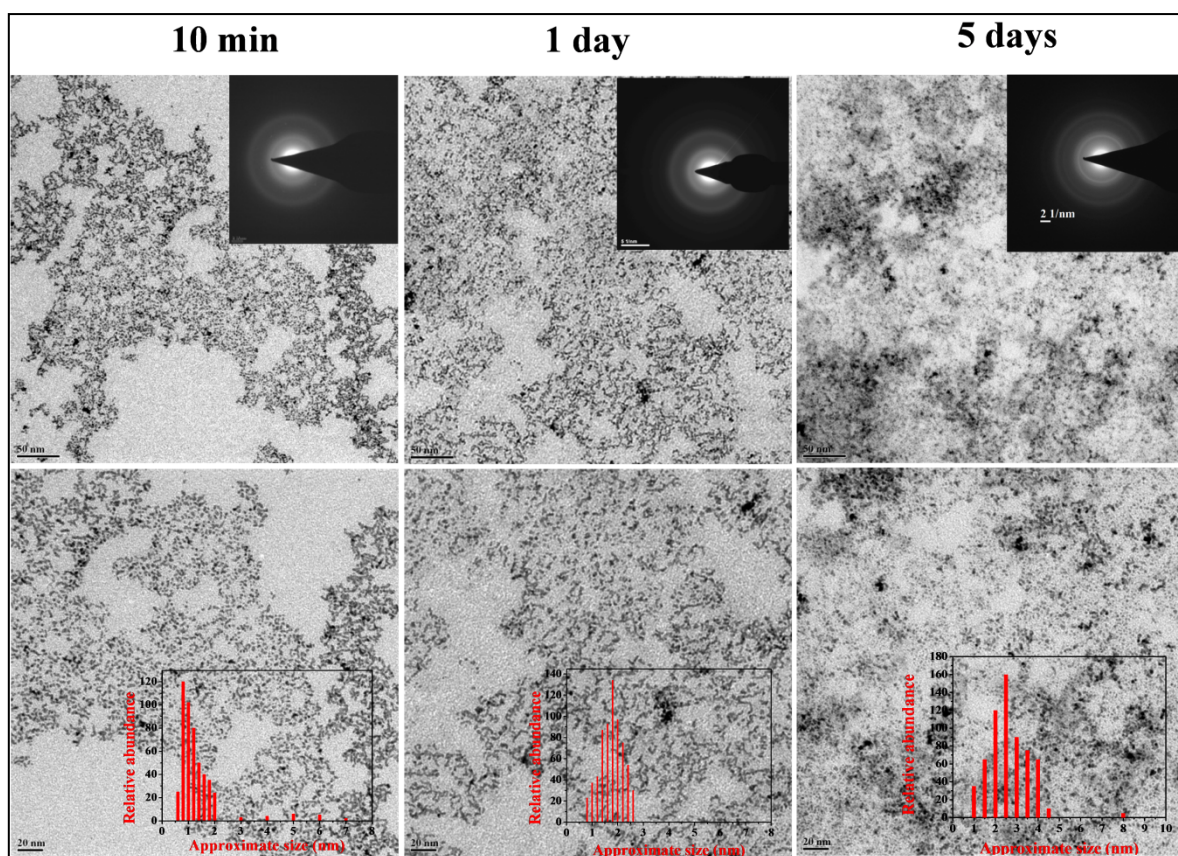

**Fig. S1:** Kinetic study of growth of Pt NPs with respect to the reaction time.

Inset shows respective electron diffractions and size distribution histograms.

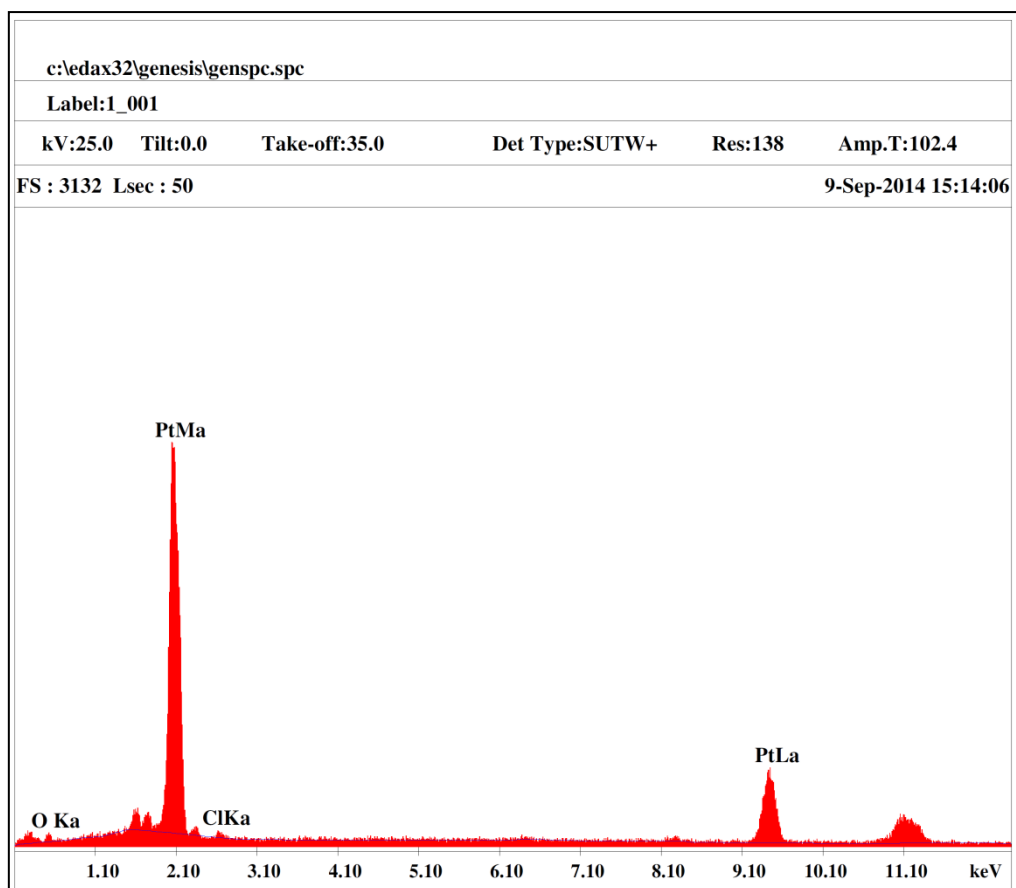

**Fig. S2** EDS for Pt NPs thin film over silicon wafer.

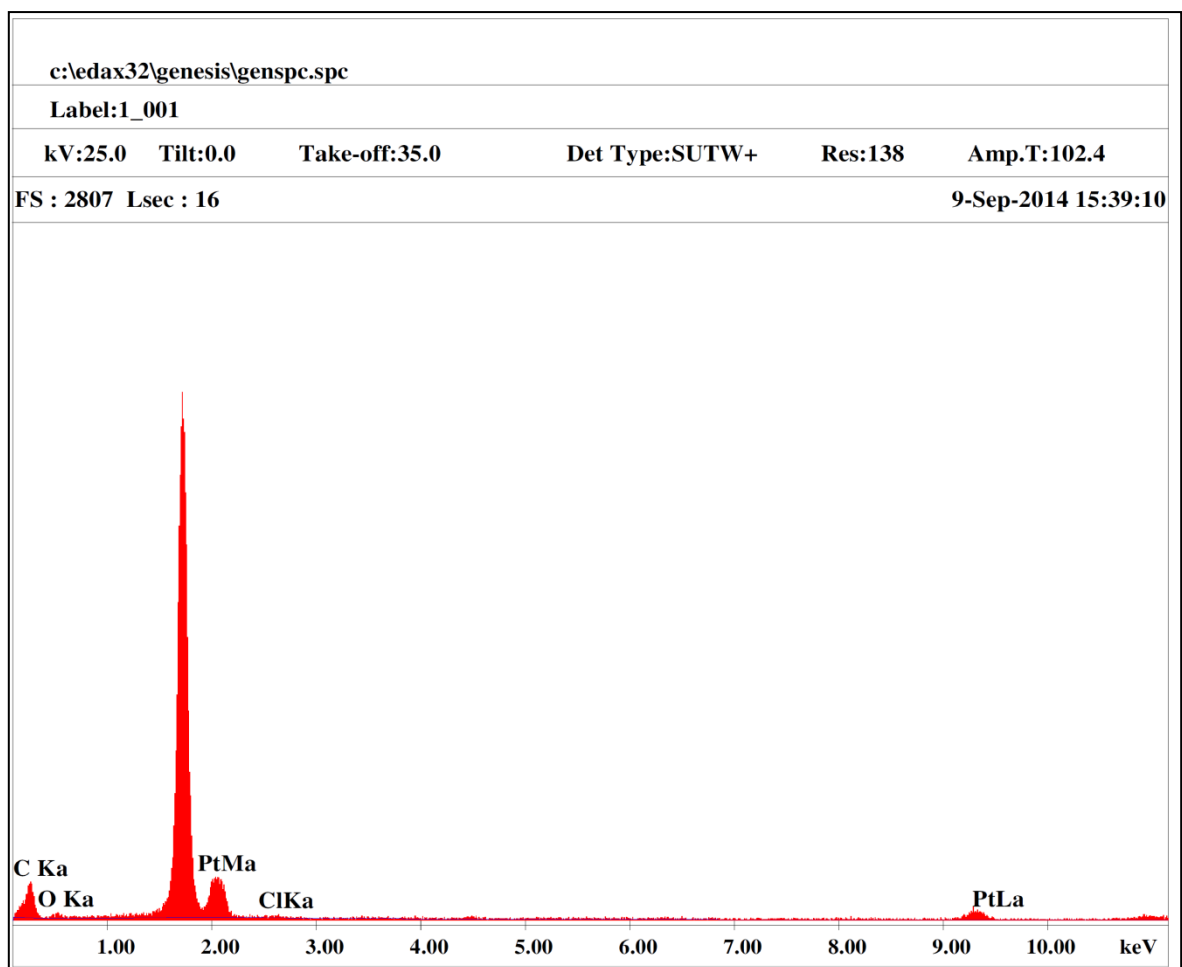

**Fig. S3** EDS for Pt-GNS composite over silicon wafer.

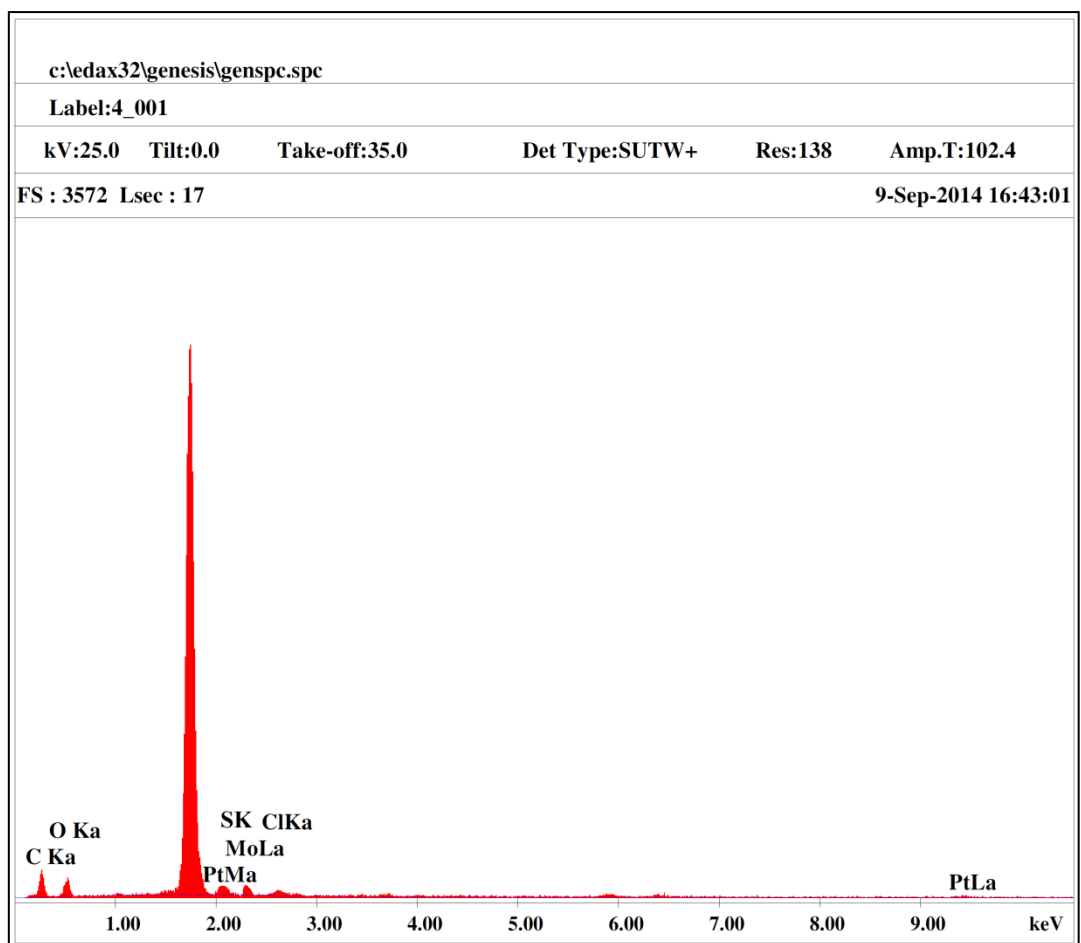

**Fig. S4** EDS for Pt-MoS<sub>2</sub> composite over silicon wafer.

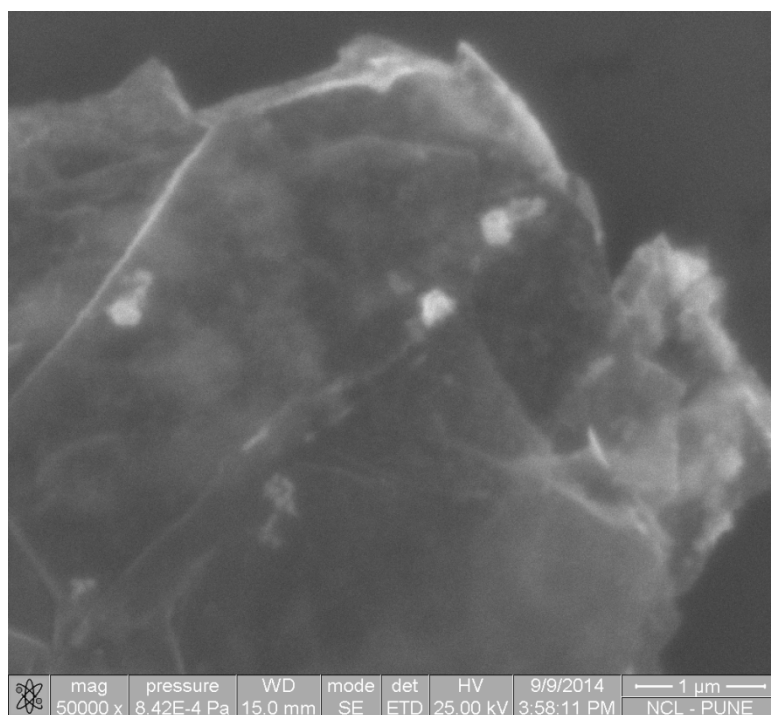

**Fig. S5** SEM image for Pt-GNS composite before electrochemical measurements.

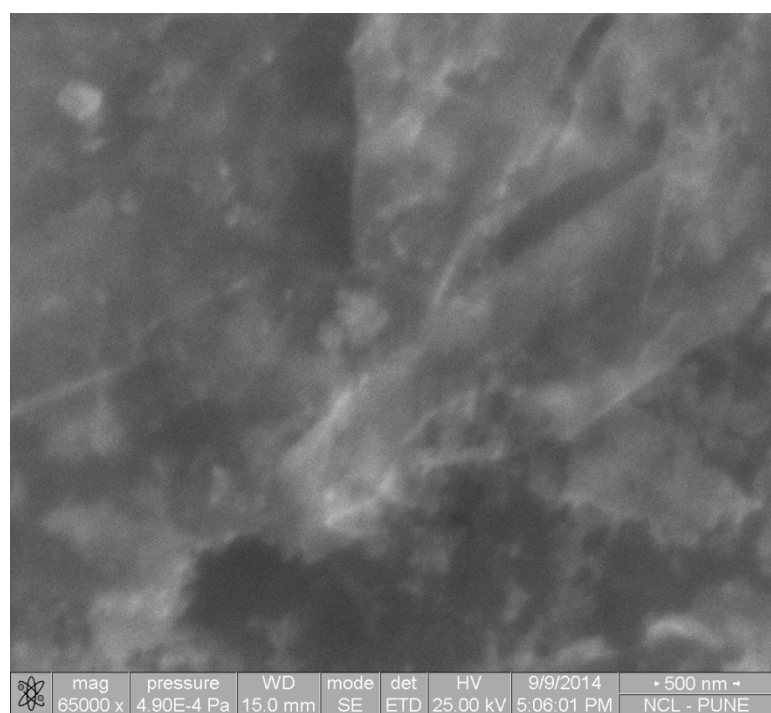

**Fig. S6** SEM image of Pt-MoS<sub>2</sub> before the electrochemical experiment.

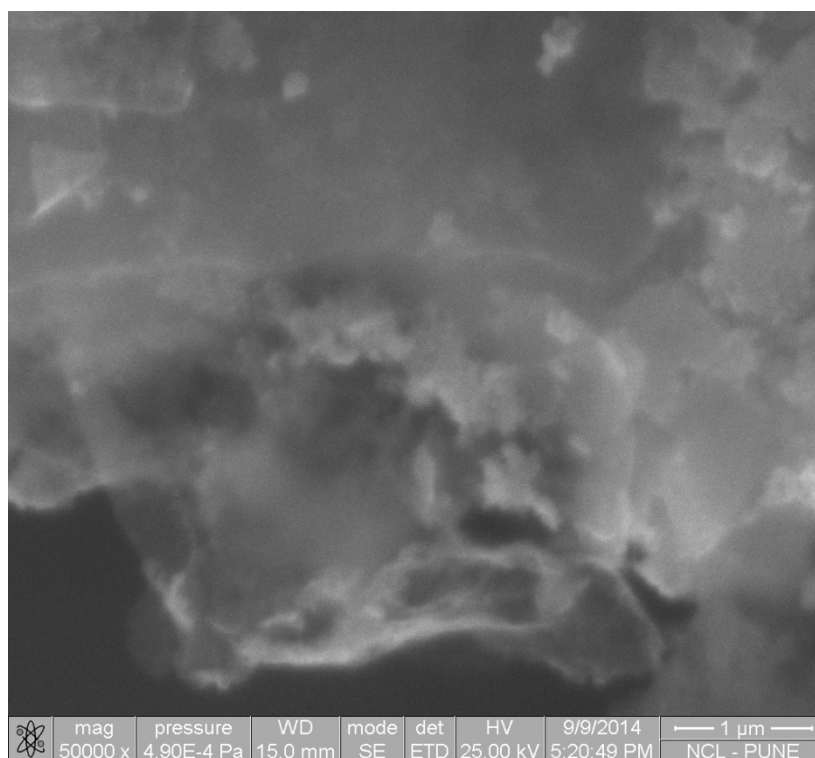

**Fig. S7** SEM image of Pt-GNS after the electrocatalytic experiment in 0.5 M HClO<sub>4</sub> + 2M methanol at a scan rate of 500 mV/s after the chronoamperometry study for 3600s.

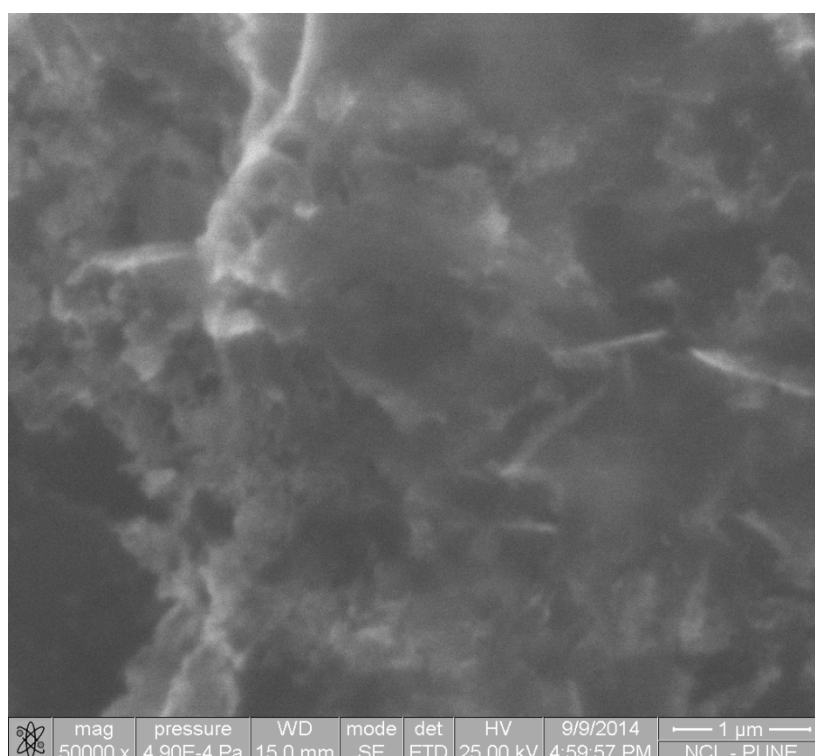

**Fig. S8** SEM image of Pt-MoS<sub>2</sub> after the electrocatalytic experiment in 0.5 M HClO<sub>4</sub> + 2M methanol at a scan rate of 500 mV/s after the chronoamperometry study for 3600s.



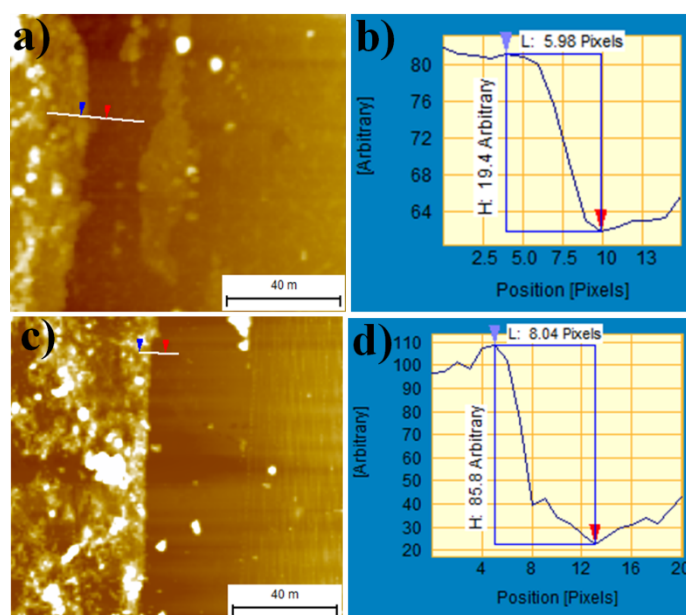

**Fig. S9** (a&c) Atomic force microscopy (AFM) images for the 20 dips coated graphene nanosheets (GNS) and 20-20 alternate Pt-GNS coated LbL composite, (b&d) height profile for a and b.

To see actual thickness of the thin film and effect of LbL deposition on interlayer spacing of GNS, an AFM study was employed. The samples were coated over the cleaned Si-wafer by using dip coating method described in manuscript. For an example 20 dips of GNS were coated over one Si wafer and 20-20 alternated dips of GNS and Pt over another Si wafer. The height profile in AFM gives the thickness of the film. The height for the 20 dips of GNS is 19.4 nm which gives the average thickness of 0.9 nm for each GNS layer. On the other hand the thickness for Pt-GNS LbL composite of 20-20 alternate dips is 85.8 nm which means the average separation between two graphene layers is 3 nm. Thus, Interlayer spacing has increased.

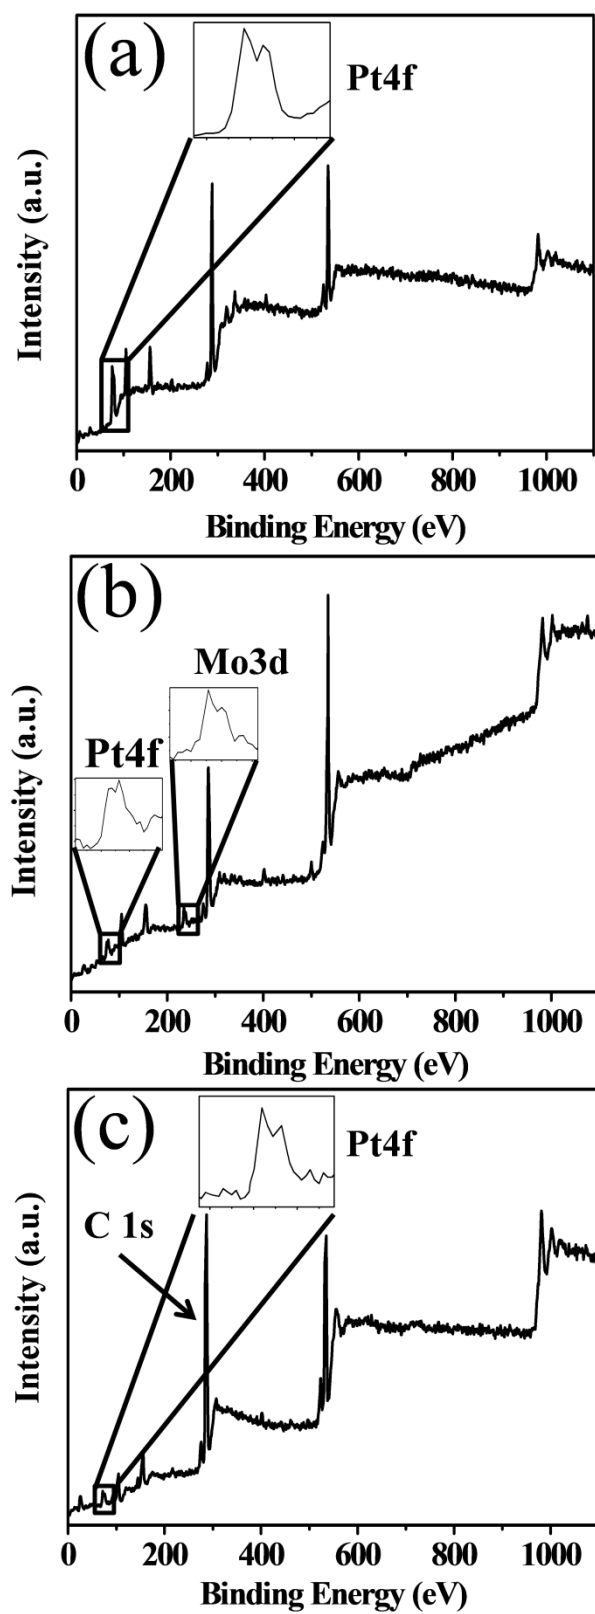

**Fig. S10** General XPS spectra for a) bare Pt NPs catalyst, inset Pt4f b) Pt-MoS<sub>2</sub> catalyst inset Pt 4f, Mo 3d and c) Pt-GNS catalyst.

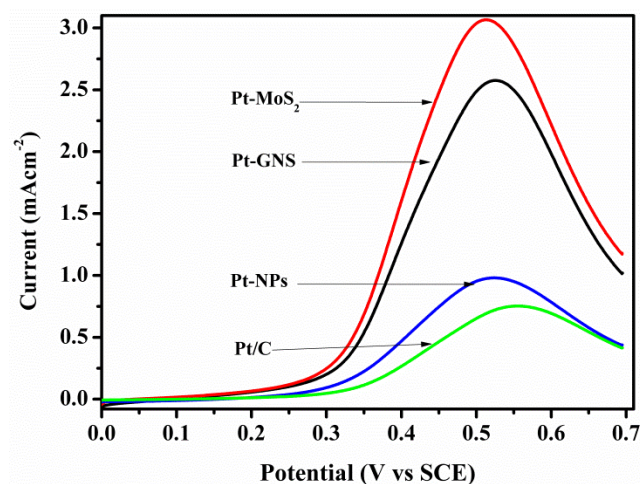

**Fig. S11** Linear sweep voltamogram (LSV) for Pt-MoS<sub>2</sub>, Pt-GNS, Pt NPs thin film and commercial Pt/C catalyst for the electrocatalytic oxidation of 0.1 M methanol in 0.5 M H<sub>2</sub>SO<sub>4</sub> solution vs SCE.

From Figure S10 it is seen that the Pt-MoS<sub>2</sub> electrode has lower onset potential (0.17V) as compare to rest of the catalysts namely Pt-GNS (0.25V), Pt NPs thin film (0.31V) and Commercial Pt/C catalyst (0.35V).

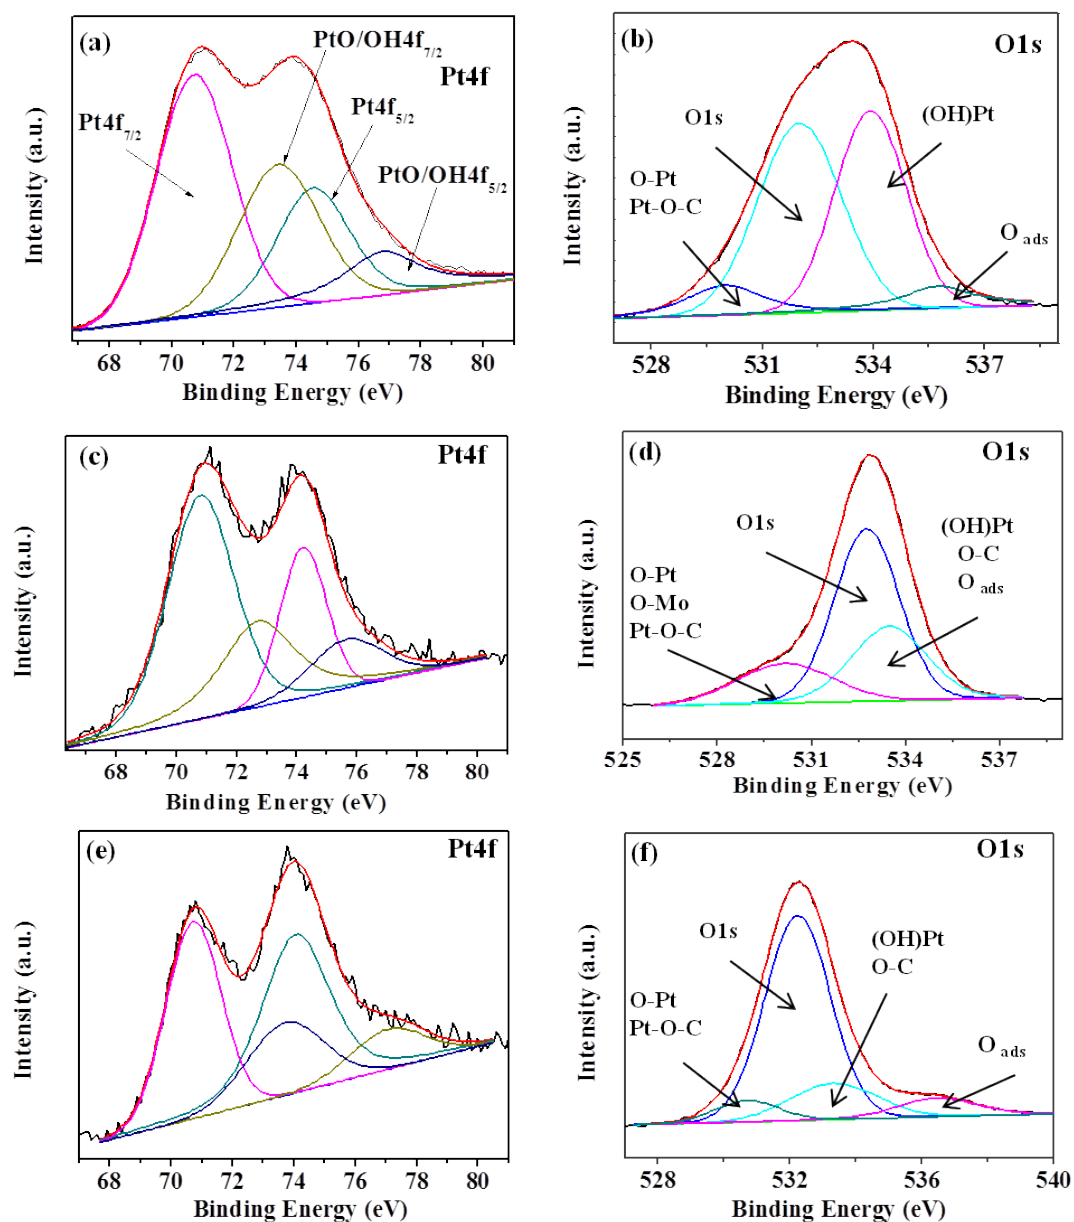

**Fig. S12:** Pt4f and O1s respectively in (a,b) PtNPs, (c,d) Pt-MoS<sub>2</sub> (e,f) Pt-GNS, after the electrochemical reaction.

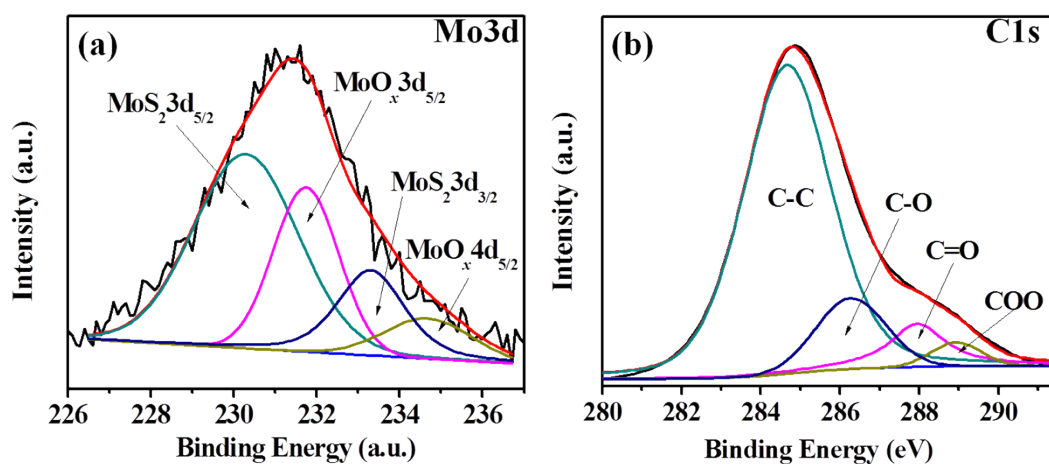

**Fig. S13** a) Mo3d and b) C1s in MoS<sub>2</sub> and GNS respectively after the electrocatalytic oxidation of methanol and chronoamperometry study.

The quantitative estimation of elemental composition and different species formed at surfaces is rather very important factor in catalyst performance therefore XPS spectra were deconvoluted and evaluated for the quantity of different species present at the surface. Following table shows the detailed analysis of all the catalyst electrodes before and after the electrocatalytic reactions.

| Sample                                 | Main peak | Deconvoluted peak(s) | Binding energy position (in eV) | Atomic % | FWHM | Species/ moiety |
|----------------------------------------|-----------|----------------------|---------------------------------|----------|------|-----------------|
| Pt NPs (before ECE)                    | Pt4f      | 4f <sub>7/2</sub>    | 70.70                           | 93.6     | 2.36 | Pt <sup>0</sup> |
|                                        |           | 4f <sub>5/2</sub>    | 74.01                           |          | 2.31 |                 |
|                                        |           | 4f <sub>7/2</sub>    | 72.73                           | 6.4      | 1.82 | Pt-Ox           |
|                                        |           | 4f <sub>5/2</sub>    | 75.99                           |          | 1.75 |                 |
| Pt NPs (After ECE)                     | Pt4f      | 4f <sub>7/2</sub>    | 70.87                           | 65.5     | 2.36 | Pt <sup>0</sup> |
|                                        |           | 4f <sub>5/2</sub>    | 75.09                           |          | 3.03 |                 |
|                                        |           | 4f <sub>7/2</sub>    | 73.55                           | 34.5     | 2.30 | Pt-Ox           |
|                                        |           | 4f <sub>5/2</sub>    | 77.32                           |          | 3.08 |                 |
| C in GNS                               | C1s       | C1s                  | 284.46                          | 75.5     | 2.59 | C-C             |
|                                        |           | C1s                  | 287.75                          | 9.1      | 1.68 | C-O             |
|                                        |           | C1s                  | 288.73                          | 3.1      | 1.49 | C=O             |
|                                        |           | C1s                  | 286.07                          | 12.4     | 2.09 | COO             |
| C in Pt-GNS (Before ECE)               | C1s       | C1s                  | 284.6                           | 86       | 1.90 | C-C             |
|                                        |           | C1s                  | 285.62                          | 7.5      | 1.89 | C-O             |
|                                        |           | C1s                  | 286.89                          | 4.4      | 1.89 | C=O             |
|                                        |           | C1s                  | 288.28                          | 1.5      | 1.62 | COO             |
| C in Pt-GNS (after ECE)                | C1s       | C1s                  | 284.61                          | 83.8     | 2.83 | C-C             |
|                                        |           | C1s                  | 287.35                          | 12.7     | 2.55 | C=O             |
|                                        |           | C1s                  | 288.96                          | 3.3      | 1.60 | COO             |
|                                        |           |                      |                                 |          |      |                 |
| Pt in Pt-GNS (Before ECE)              | Pt4f      | 4f <sub>7/2</sub>    | 70.70                           | 90.6     | 2.35 | Pt <sup>0</sup> |
|                                        |           | 4f <sub>5/2</sub>    | 74.15                           |          | 2.31 |                 |
|                                        |           | 4f <sub>7/2</sub>    | 72.73                           | 9.4      | 1.82 | Pt-Ox           |
|                                        |           | 4f <sub>5/2</sub>    | 75.99                           |          | 1.75 |                 |
| Pt in Pt-GNS (After ECE)               | Pt4f      | 4f <sub>7/2</sub>    | 70.8                            | 71.9     | 2.62 | Pt <sup>0</sup> |
|                                        |           | 4f <sub>5/2</sub>    | 74.20                           |          | 1.83 |                 |
|                                        |           | 4f <sub>7/2</sub>    | 72.71                           | 28.1     | 2.88 | Pt-Ox           |
|                                        |           | 4f <sub>5/2</sub>    | 75.65                           |          | 2.88 |                 |
| Mo in MoS <sub>2</sub> (Before ECE)    | Mo3d      | 3d <sub>5/2</sub>    | 230.14                          | 99.9     | 1.51 | Mo-S-Mo         |
|                                        |           | 3d <sub>3/2</sub>    | 233.29                          |          | 1.78 |                 |
| Mo in MoS <sub>2</sub> (After ECE)     | Mo3d      | 3d <sub>5/2</sub>    | 230.29                          | 66.2     | 2.98 | Mo-S-Mo         |
|                                        |           | 3d <sub>3/2</sub>    | 231.74                          |          | 1.86 |                 |
|                                        |           | 3d <sub>5/2</sub>    | 234.69                          | 33.78    | 2.48 | Mo-Ox           |
|                                        |           | 3d <sub>3/2</sub>    | 233.31                          |          | 1.90 |                 |
| Pt in Pt-MoS <sub>2</sub> (Before ECE) | Pt 4f     | 4f <sub>7/2</sub>    | 70.47                           | 86.78    | 2.94 | Pt <sup>0</sup> |
|                                        |           | 4f <sub>5/2</sub>    | 73.73                           |          | 2.45 |                 |
|                                        |           | 4f <sub>7/2</sub>    | 73.42                           | 13.21    | 1.59 | Pt-Ox           |
|                                        |           | 4f <sub>5/2</sub>    | 76.73                           |          | 2.75 |                 |
| Pt in Pt-MoS <sub>2</sub> (After ECE)  | Pt 4f     | 4f <sub>7/2</sub>    | 70.72                           | 73.2     | 2.59 | Pt <sup>0</sup> |
|                                        |           | 4f <sub>5/2</sub>    | 74.10                           |          | 2.12 |                 |
|                                        |           | 4f <sub>7/2</sub>    | 73.72                           | 26.8     | 2.88 | Pt-Ox           |
|                                        |           | 4f <sub>5/2</sub>    | 77.15                           |          | 2.97 |                 |

**Table-S3.** Quantitative measurement of elemental and chemical composition for catalysts used before and after Electro-Chemical Experiment (ECE) by using XPS.

## References:

- S1. a) K. Kinoshita and P. Stonehart, "Preparation and Characterization of Highly Dispersed Electrocatalytic Materials" in *Modern Aspects of Electrochemistry*, Vol. 12, Ch. 4, b) J.O.M Bockris and B.E. Conway, Eds., Plenum Press: New York, 183- 266 (1977).
- S2. T.R. Ralph, G.A. Hards, J.E. Keating, S.A. Campbell, D.P. Wilkinson, M. Davis, J. St-Pierre and M.C. Johnson, *J. Electrochem. Soc.*, 144, 3845-3857 (1997).
- S3. F. Gloaguen, J.-M. Leger and C. Lamy, *J. Appl. Electrochem.*, 27, 1052 (1997).
- S4. B. Lim, M. Jiang, P. H. Camargo, E. C. Cho, J. Tao, X. Lu, Y. Zhu and Y. Xia, *Science*, 2009, **324**, 1302.
- S5. J. Wu, A. Gross and H. Yang, *Nano Lett.*, 2011, **11**, 798.
- S6. Y. Tan, J. Fan, G. Chen, N. Zheng and Q. Xie, *Chem. Commun.*, 2011, **47**, 11624.
- S7. Yueming Tan,<sup>a</sup> Chaofa Xu,<sup>a</sup> Guangxu Chen,<sup>a</sup> Nanfeng Zheng<sup>\*a</sup> and Qingji Xie *Energy Environ. Sci.*, **2012**, *5*, 6923-6927
- S8. R. Kou, Y. Shao, D. Wang, M. H. Engelhard, J. H. Kwak, J. Wang, V. V. Viswanathan, C. Wang, Y. Lin, Y. Wang, I. A. Aksay and J. Liu, *Electrochem. Commun.*, 2009, **11**, 954.
- S9. Y. Garsany, O. A. Baturina and K. E. Swider-Lyons, *Anal. Chem.* 2010, **82**, 6321.
- S10. Z. Yao, M. Zhu, F. Jiang, Y. Du, C. Wang, P. Yang, *J. Mater. Chem.* 2012, **22**, 13707-13713.
